# Supplementary material
Source: publisher site journal article supplement (https://www.dovepress.com/article/496326)
Supplement: Supplementary file 1 [file get_supplementary_file.php]

**Appendix**

| Dear Friend,  We are researchers from Beijing Geriatric Hospital and Beijing Tongren Hospital(CMU) Mentougou Hospital, and we sincerely invite you to participate in our research project. This study aims to understand healthcare professionals' knowledge, attitudes, and practices regarding stem cell therapy for Sarcopenia. The goal is to provide evidence for developing scientifically sound early intervention strategies, which may help improve the health condition of patients and benefit more people in the future. Your participation in this study is voluntary. If you agree to participate, please read the following instructions:  1. Please complete the questionnaire. There are no right or wrong answers, and you only need to fill it out based on your actual situation. If you have any questions during the answering process, feel free to reach out to us. Please submit the questionnaire promptly after completion.  2. This study involves a simple questionnaire survey, which will not cause harm to your physical or psychological condition. However, it may involve some privacy issues, such as your gender and age. We will strictly maintain confidentiality and not disclose your information. Please feel free to fill it out.  3. As a participant, you can always inquire about information and research progress related to this study. If you decide to withdraw from the study, please inform us, and your data will not be included in the research results.  Finally, we sincerely thank you for taking the time out of your busy schedule to support our scientific research!  □I have read and agree to have the data collected used for scientific research.  Signature of informed consent：  Date of participation: Year Month Day |
| --- |

| **Part One: Basic Information** | | | | |
| --- | --- | --- | --- | --- |
| 1. **age:** | **Years old** | | | |
| 1. **gender：** | | A. male | B. female |  |
| 1. **marital status：** | | A. single  B. married  C. divorced  D. widowed | | |
| 1. **education：** | | A. college  B. bachelor’s degree  C. master’s degree and above | | |
| 1. **occupation** | | 1. physician 2. nurse | | |
| **6.professional title:** | | A. no title  B. junior  C. intermediate  D. associate senior  E. senior | | |
| **7.** **Nature of your current institution:** | | A. Public Level One  B. Public Level Two  C. Public Level Three  D. Private Hospital | | |
| **8.** **Current department** | | A．Geriatrics Department  B．Orthopedics Department  C．Nutrition Department  D．Oncology Department  E．Rehabilitation Medicine Department  F. Endocrinology Department  G. Respiratory Department  H．Alzheimer's Disease Ward  I．General Surgery Department  J．Other Departments | | |
| **9.** **Duration of work in the current department** | | years | | |
| **10.Frequency of contact with Sarcopenia in your department** | | 1. Every six months or longer   B．Quarterly  C．Monthly  D．Weekly  E．Daily | | |
| **11.** **Frequency of diagnosing and treating Sarcopenia** | | A. Every six months or longer  B．Quarterly  C．Monthly  D．Weekly  E．Daily | | |
| **12 Have you diagnosed and treated patients with Sarcopenia in the past six months?** | | A. yes  B. no | | |

| **Part Two: Understanding of Knowledge about Stem Cell Therapy for Sarcopenia** | | | |
| --- | --- | --- | --- |
| Please make judgments on the following questions based on your existing knowledge. If you are unsure, you may select "Uncertain." | | | |
| 1. **Sarcopenia (MD) is characterized by age-related loss of skeletal muscle mass, strength, or physical function.** | A．yes | B．no | C．uncertain |
| 1. **MD is one of the syndromes associated with aging, leading to weakness, decreased quality of life, physical disability, and, in severe cases, death.** | A．yes | B．no | C．uncertain |
| 1. **Lack of exercise and malnutrition are considered primary risk factors for MD.** | A．yes | B．no | C．uncertain |
| 1. **Clinical practices for treating MD include supplementation of proteins, amino acids, vitamin D, creatine, and HMB, as well as resistance training to increase muscle mass and strength.** | A．yes | B．no | C．uncertain |
| 1. **The pathogenesis of MD is associated with decreased muscle cell regeneration ability, increased oxidative stress, and inflammatory response.** | A．yes | B．no | C．uncertain |
| 1. **Stem cell therapy is a form of regenerative medicine aimed at repairing damaged cells within the body by reducing inflammation and modulating the immune system.** | A．yes | B．no | C．uncertain |
| 1. **Stem cell therapy utilizes stem cells or their derivatives to stimulate the body's own healing processes and repair damaged, diseased, or injured tissues.** | A．yes | B．no | C．uncertain |
| 1. **Mesenchymal stem cells can regulate immunity, suppress inflammation, and activate endogenous stem cells to facilitate tissue repair through the secretion of bioactive substances.** | A．yes | B．no | C．uncertain |
| 1. **Wharton's jelly-derived mesenchymal stem cells are considered an ideal source of mesenchymal stem cells.** | A．yes | B．no | C．uncertain |
| 1. **Research has shown that stem cell transplantation can reduce inflammation and oxidative stress in skeletal muscles of malnourished mice, improving muscle cell regeneration capacity.** | A．yes | B．no | C．uncertain |
| 1. **Mesenchymal stem cells have entered clinical research stages for many diseases.** | A．yes | B．no | C．uncertain |
| 1. **Stem cell therapy has the potential to become a new therapeutic intervention for alleviating MD.** | A．yes | B．no | C．uncertain |

| **Part Three: Attitudes Towards Stem Cell Therapy for Sarcopenia** | |
| --- | --- |
| 1. **Do you believe it is necessary to continue improving and developing research on stem cell therapy for Sarcopenia?** | A. strongly agree  B. agree  C. neutral  D. disagree  E. strongly disagree |
| 1. **Do you support the future use of stem cell therapy as a treatment option for Sarcopenia?** | A. strongly agree  B. agree  C. neutral  D. disagree  E. strongly disagree |
| 1. **Do you believe that stem cell therapy will have a significant impact on the future treatment of Sarcopenia?** | A. strongly agree  B. agree  C. neutral  D. disagree  E. strongly disagree |
| 1. **Are you willing to or currently conducting research on stem cell therapy for Sarcopenia?** | A. strongly agree  B. agree  C. neutral  D. disagree  E. strongly disagree |
| 1. **Do you have confidence in research on stem cell therapy for Sarcopenia?** | A. strongly agree  B. agree  C. neutral  D. disagree  E. strongly disagree |
| 1. **Do you think research on stem cell therapy for Sarcopenia is meaningful for improving the quality of life of patients in the future?** | A. strongly agree  B. agree  C. neutral  D. disagree  E. strongly disagree |
| 1. **Do you think current clinical interventions through nutritional interventions and resistance exercise effectively improve Sarcopenia in patients?** | A. strongly agree  B. agree  C. neutral  D. disagree  E. strongly disagree |

| **Part Four: Practice of Stem Cell Therapy for Sarcopenia** | | |
| --- | --- | --- |
| 1. **Would you participate in academic conferences related to stem cell therapy for Sarcopenia?** | A. very consistent  B. consistent  C. neutral  D. inconsistent  E. very inconsistent |
| 1. **Would you proactively seek out the latest research developments on treatments for Sarcopenia?** | A. very consistent  B. consistent  C. neutral  D. inconsistent  E. very inconsistent | |
| 1. **Would you proactively seek out the latest research developments on stem cell therapy for diseases?** | A. very consistent  B. consistent  C. neutral  D. inconsistent  E. very inconsistent | |
| 1. **Have you ever proposed ideas to conduct research on stem cell therapy for Sarcopenia?** | A. very consistent  B. consistent  C. neutral  D. inconsistent  E. very inconsistent | |
| 1. **Do you plan to conduct research related to stem cell therapy for Sarcopenia?** | A. very consistent  B. consistent  C. neutral  D. inconsistent  E. very inconsistent | |
| 1. **Would you proactively educate colleagues about relevant knowledge regarding stem cell therapy for Sarcopenia?** | A. very consistent  B. consistent  C. neutral  D. inconsistent  E. very inconsistent | |
| 1. **Are you currently involved in research or projects related to stem cell therapy for Sarcopenia?** | A. very consistent  B. consistent  C. neutral  D. inconsistent  E. very inconsistent | |

**Supplementary table 1. Univariate and multivariate analysis for knowledge dimension**

| **Knowledge** | Univariable |  | Multivariable |  |
| --- | --- | --- | --- | --- |
| OR (95%CI) | P | Median (25%,75%) | P |
| **1. age:** |  |  |  |  |
| 18-29 |  |  |  |  |
| 30-39 | 1.26 (0.70,2.26) | 0.443 |  |  |
| 40-49 | 1.45 (0.87,2.42) | 0.156 |  |  |
| >=50 | 1.04 (0.57,1.90) | 0.903 |  |  |
| **2. gender:** |  |  |  |  |
| Male |  |  |  |  |
| Female | 0.93 (0.63,1.38) | 0.714 |  |  |
| **3. marital status:** |  |  |  |  |
| Single |  |  |  |  |
| Married | 1.67 (1.03,2.73) | 0.038 | 2.11 (0.96,4.63) | 0.062 |
| Divorced | 2.63 (0.89,8.36) | 0.086 | 3.41 (0.90,12.94) | 0.071 |
| **4. education:** |  |  |  |  |
| College |  |  |  |  |
| Bachelor’s degree | 0.87 (0.51,1.47) | 0.608 |  |  |
| Master’s degree and above | 0.75 (0.42,1.33) | 0.328 |  |  |
| **5. occupation:** |  |  |  |  |
| Physician |  |  |  |  |
| Nurse | 0.90 (0.59,1.37) | 0.627 |  |  |
| Technician | 0.48 (0.18,1.19) | 0.124 |  |  |
| **6. professional title:** |  |  |  |  |
| No title |  |  |  |  |
| Junior | 2.80 (1.38,5.83) | 0.005 | 1.78 (0.78,4.08) | 0.170 |
| Intermediate | 1.92 (1.01,3.76) | 0.052 | 0.85 (0.32,2.28) | 0.745 |
| Associate senior | 1.98 (1.02,3.94) | 0.047 | 0.71 (0.24,2.07) | 0.529 |
| Senior | 1.74 (0.81,3.83) | 0.161 | 0.64 (0.20,2.06) | 0.450 |
| **7. Nature of your current institution:** |  |  |  |  |
| Public Level One |  |  |  |  |
| Public Level Two | 1.81 (0.77,4.55) | 0.184 | 1.89 (0.74,4.82) | 0.181 |
| Public Level Three | 2.46 (1.10,5.88) | 0.033 | 2.37 (0.97,5.77) | 0.057 |
| Private Hospital | 1.41 (0.52,3.98) | 0.509 | 1.34 (0.46,3.93) | 0.594 |
| **9. Duration of work in the current department:** |  |  |  |  |
| 6-10 years |  |  |  |  |
| 10-20 years | 1.65 (1.01,2.70) | 0.046 | 1.58 (0.85,2.95) | 0.152 |
| >=20 years | 1.11 (0.73,1.70) | 0.624 | 1.43 (0.75,2.73) | 0.283 |
| **10. Frequency of contact with sarcopenia in your department:** |  |  |  |  |
| Every six months or longer |  |  |  |  |
| Quarterly | 1.44 (0.71,2.94) | 0.308 | 0.62 (0.18,2.13) | 0.451 |
| Monthly | 2.12 (1.02,4.60) | 0.048 | 1.07 (0.26,4.49) | 0.926 |
| Weekly | 1.05 (0.48,2.29) | 0.899 | 0.46 (0.10,2.01) | 0.298 |
| Daily | 2.06 (1.14,3.80) | 0.017 | 0.76 (0.24,2.42) | 0.644 |
| **11. Frequency of diagnosing and treating sarcopenia:** |  |  |  |  |
| Every six months or longer |  |  |  |  |
| Quarterly | 2.44 (1.20,5.21) | 0.016 | 1.73 (0.46,6.55) | 0.422 |
| Monthly | 1.66 (0.75,3.83) | 0.217 | 0.62 (0.13,2.88) | 0.538 |
| Weekly | 1.22 (0.57,2.60) | 0.602 | 0.91 (0.20,4.08) | 0.905 |
| Daily | 2.25 (1.12,4.71) | 0.025 | 1.09 (0.29,3.99) | 0.902 |
| **12. Treated patients with sarcopenia in the past six months:** |  |  |  |  |
| Yes |  |  |  |  |
| No | 0.40 (0.26,0.60) | <0.001 | 0.30 (0.15,0.62) | 0.001 |

**Supplementary table 2. Univariate and multivariate analysis for attitude dimension**

| **Attitude** | Univariable |  | Multivariable |  |
| --- | --- | --- | --- | --- |
| OR (95%CI) | P | Median (25%,75%) | P |
| **Knowledge** | 1.09 (1.06,1.12) | <0.001 | 1.09 (1.06,1.12) | <0.001 |
| **1. age:** |  |  |  |  |
| 18-29 |  |  |  |  |
| 30-39 | 1.84 (0.94,3.66) | 0.076 | 1.76 (0.86,3.62) | 0.122 |
| 40-49 | 1.26 (0.72,2.18) | 0.413 | 1.07 (0.59,1.94) | 0.814 |
| >=50 | 0.59 (0.32,1.10) | 0.099 | 0.59 (0.30,1.16) | 0.128 |
| **2. gender:** |  |  |  |  |
| Male |  |  |  |  |
| Female | 1.07 (0.70,1.64) | 0.754 |  |  |
| **3. marital status:** |  |  |  |  |
| Single |  |  |  |  |
| Married | 1.16 (0.69,1.93) | 0.562 |  |  |
| Divorced | 0.60 (0.20,1.83) | 0.355 |  |  |
| **4. education:** |  |  |  |  |
| College |  |  |  |  |
| Bachelor’s degree | 1.05 (0.57,1.87) | 0.872 |  |  |
| Master’s degree and above | 0.65 (0.34,1.20) | 0.173 |  |  |
| **5. occupation:** |  |  |  |  |
| Physician |  |  |  |  |
| Nurse | 1.36 (0.86,2.19) | 0.203 |  |  |
| Technician | 1.15 (0.45,3.32) | 0.774 |  |  |
| **6. professional title:** |  |  |  |  |
| No title |  |  |  |  |
| Junior | 1.17 (0.53,2.52) | 0.699 |  |  |
| Intermediate | 0.95 (0.46,1.88) | 0.884 |  |  |
| Associate senior | 0.68 (0.33,1.36) | 0.283 |  |  |
| Senior | 1.28 (0.54,3.06) | 0.581 |  |  |
| **7. Nature of your current institution:** |  |  |  |  |
| Public Level One |  |  |  |  |
| Public Level Two | 3.06 (1.30,7.32) | 0.010 | 2.07 (0.80,5.33) | 0.134 |
| Public Level Three | 3.11 (1.41,6.93) | 0.005 | 1.86 (0.77,4.47) | 0.166 |
| Private Hospital | 1.92 (0.73,5.21) | 0.191 | 1.28 (0.44,3.72) | 0.650 |
| **9. Duration of work in the current department:** |  |  |  |  |
| 6-10 years |  |  |  |  |
| 10-20 years | 1.48 (0.85,2.63) | 0.175 |  |  |
| >=20 years | 0.79 (0.50,1.24) | 0.305 |  |  |
| **10. Frequency of contact with sarcopenia in your department:** |  |  |  |  |
| Every six months or longer |  |  |  |  |
| Quarterly | 0.67 (0.32,1.41) | 0.275 |  |  |
| Monthly | 0.69 (0.33,1.50) | 0.331 |  |  |
| Weekly | 0.83 (0.37,1.99) | 0.662 |  |  |
| Daily | 1.02 (0.55,2.00) | 0.945 |  |  |
| **11. Frequency of diagnosing and treating sarcopenia:** |  |  |  |  |
| Every six months or longer |  |  |  |  |
| Quarterly | 0.94 (0.45,2.05) | 0.865 |  |  |
| Monthly | 0.56 (0.25,1.30) | 0.166 |  |  |
| Weekly | 1.35 (0.59,3.51) | 0.499 |  |  |
| Daily | 0.97 (0.47,2.13) | 0.946 |  |  |
| **12. Treated patients with sarcopenia in the past six months:** |  |  |  |  |
| Yes |  |  |  |  |
| No | 0.79 (0.50,1.23) | 0.307 |  |  |

**Supplementary table 3. Univariate and multivariate analysis for practice dimension**

| **Practice** | Univariable |  | Multivariable |  |
| --- | --- | --- | --- | --- |
| OR (95%CI) | P | Median (25%,75%) | P |
| **Knowledge** | 1.10 (1.06,1.13) | <0.001 | 1.05 (1.01,1.09) | 0.027 |
| **Attitude** | 1.60 (1.46,1.75) | <0.001 | 1.61 (1.45,1.78) | <0.001 |
| **1. age:** |  |  |  |  |
| 18-29 |  |  |  |  |
| 30-39 | 1.09 (0.60,2.00) | 0.778 |  |  |
| 40-49 | 0.70 (0.41,1.21) | 0.198 |  |  |
| >=50 | 0.74 (0.38,1.40) | 0.350 |  |  |
| **2. gender:** |  |  |  |  |
| Male |  |  |  |  |
| Female | 1.15 (0.75,1.76) | 0.533 |  |  |
| **3. marital status:** |  |  |  |  |
| Single |  |  |  |  |
| Married | 1.04 (0.63,1.76) | 0.881 |  |  |
| Divorced | 1.03 (0.30,3.15) | 0.958 |  |  |
| **4. education:** |  |  |  |  |
| College |  |  |  |  |
| Bachelor’s degree | 0.66 (0.39,1.12) | 0.122 | 1.06 (0.43,2.61) | 0.897 |
| Master’s degree and above | 0.32 (0.17,0.59) | <0.001 | 0.59 (0.20,1.72) | 0.330 |
| **5. occupation:** |  |  |  |  |
| Physician |  |  |  |  |
| Nurse | 2.32 (1.50,3.60) | <0.001 | 1.34 (0.60,3.00) | 0.473 |
| Technician | 2.73 (1.10,6.72) | 0.028 | 3.35 (0.92,12.23) | 0.067 |
| **6. professional title:** |  |  |  |  |
| No title |  |  |  |  |
| Junior | 1.51 (0.75,3.10) | 0.253 | 1.16 (0.41,3.27) | 0.774 |
| Intermediate | 0.77 (0.40,1.51) | 0.440 | 0.52 (0.18,1.52) | 0.235 |
| Associate senior | 0.46 (0.22,0.95) | 0.035 | 0.40 (0.12,1.32) | 0.133 |
| Senior | 0.80 (0.36,1.78) | 0.586 | 0.84 (0.23,3.03) | 0.788 |
| **7. Nature of your current institution:** |  |  |  |  |
| Public Level One |  |  |  |  |
| Public Level Two | 0.61 (0.26,1.48) | 0.265 |  |  |
| Public Level Three | 0.74 (0.34,1.70) | 0.468 |  |  |
| Private Hospital | 0.52 (0.18,1.46) | 0.213 |  |  |
| **9. Duration of work in the current department:** |  |  |  |  |
| 6-10 years |  |  |  |  |
| 10-20 years | 1.11 (0.66,1.85) | 0.688 |  |  |
| >=20 years | 0.80 (0.51,1.28) | 0.357 |  |  |
| **10. Frequency of contact with sarcopenia in your department:** |  |  |  |  |
| Every six months or longer |  |  |  |  |
| Quarterly | 0.80 (0.34,1.71) | 0.581 | 1.13 (0.24,5.33) | 0.875 |
| Monthly | 1.50 (0.70,3.12) | 0.283 | 1.03 (0.20,5.40) | 0.968 |
| Weekly | 0.50 (0.16,1.26) | 0.175 | 0.99 (0.12,8.39) | 0.995 |
| Daily | 1.71 (0.94,3.09) | 0.075 | 2.30 (0.46,11.62) | 0.314 |
| **11. Frequency of diagnosing and treating sarcopenia:** |  |  |  |  |
| Every six months or longer |  |  |  |  |
| Quarterly | 1.02 (0.47,2.11) | 0.957 | 0.34 (0.07,1.67) | 0.184 |
| Monthly | 1.45 (0.62,3.27) | 0.378 | 2.07 (0.32,13.36) | 0.444 |
| Weekly | 0.58 (0.21,1.38) | 0.249 | 0.18 (0.02,1.38) | 0.098 |
| Daily | 1.97 (0.98,3.93) | 0.053 | 0.45 (0.07,2.84) | 0.397 |
| **12. Treated patients with sarcopenia in the past six months:** |  |  |  |  |
| Yes |  |  |  |  |
| No | 0.56 (0.37,0.86) | 0.008 | 0.42 (0.17,1.05) | 0.063 |

Supplementary table 4. Bootstrap analysis of mediating effect significance test for the final mode.

| **Model paths** | | **Total effects** | | **Direct Effect** | | **Indirect effect** | |
| --- | --- | --- | --- | --- | --- | --- | --- |
| β(95% CI) | P | β(95% CI) | P | β(95% CI) | P |
| Asum |  |  |  |  |  |  |  |
|  | Ksum | 0.475 (0.398,0.553) | <0.001 | 0.475 (0.398,0.553) | <0.001 |  |  |
| Psum |  |  |  |  |  |  |  |
|  | Asum | 0.624(0.551,0.696) | <0.001 | 0.624(0.551,0.696) | <0.001 |  |  |
|  | Ksum | 0.423(0.341,0.506) | <0.001 | 0.127(0.041,0.213) | 0.004 | 0.296(0.235,0.357) | <0.001 |
